# Supplementary material
Source: HighWire-hosted journal article supplement (https://bmjopenquality.bmj.com/highwire/filestream/136228/field_highwire_adjunct_files/2/ds6218.pdf)
Supplement: ds6218.pdf [file ds6218.pdf]

**Operation Report – Right Shoulder Arthroscopy And Rotator Cuff Repair**

**Patient Details:** Testing Testing **DOB:** 01/01/1952  
**H/N:** 20021974 **NHS No:**  
**Date of Op:** 22/05/2015 **Consultant:** DIC - Mr D I Clark FRCS (Orth)  
**Operating Surgeon:** K. Theivendran **Assistant:** A. Firth  
**Anaesthetist:** C5205046 - Dr Am Saxena  
**Diagnosis:** M75.0 - Rotator cuff tear  
**Procedure:** 116 - ASD + 1 tendon (small) cuff repair (arthroscopic)O29.1 - Y76.7 - T79.1 -  
**Co Morbidities:** I20.9 - Angina Pectoris  
G30.0 - Alzheimer's Disease With Early Onset  
G30.9 - Alzheimer's Disease

**Shoulder Arthroscopy Details**

**Antibiotics:** Iv Cefuroxime 1.5g  
**Anaesthesia:** General  
**Local Anaesthetic:** 10ml 0.5% Bupivacaine with 1:200:000 adrenaline to portal sites  
**Operating Position:** Beach Chair  
**Shoulder Side:** Right  
**Preparation:** Alcoholic Povidone Iodine + DHS Drape  
**Portals:** On Demand  
**Closure:** Steristrips  
**Dressings:** Melonin, Wool Pad & Sleaf  
**Sling:** Polysling  
**ASA Grade:** 2  
**EUA:** **EUA:ER:**30 degrees **EUA:FF:**60 degrees **EUA:Other Details:**

**Shoulder Arthroscopy Findings**

**Rotator Cuff Tear:** Supraspinatus **Rotator Cuff Tear Size:** Medium (1-3cm)  
**Subscapularis Tear:** Upper 25% **Biceps:** Normal  
**Laberal Tear:** No **Calcific Tendonitis:** No  
**Frozen Shoulder:** No **Humeral Cartilage:** Normal  
**Glenoid Cartilage:** Normal **Subacromial Space:** A3 - Bare Bone Areas; B3 - Full  
**ACJ:** Normal Thickness Tear

**Procedure**

Subacromial Bursectomy Performed Using Arthrocare Wand 90. Footprint Prepared Using Shaver And 5.0mm Twinfix Ultrabraid Anchor Inserted. Medial And Lateral Mattress Sutures Applied And Cuff Edges Tied Down To Footprint. Water Tight Closure. Subacromial Decompression Performed Using Bone Cutter Shaver To Anterolateral Acromion.

**Post Operative Instructions**

**Sling Duration:** 6 Weeks  
**Clinic Follow Up:** 2 Weeks  
**Physiotherapy:** Cuff repair protocol  
**Wound Check:** 48 hrs GP practice nurse

**Consultant's Signature:**.....**Date:** 11/06/2015
